# Supplementary material for: Changes of RAS Pathway Phosphorylation in Lymphoblastoid Cell Lines from Noonan Syndrome Patients Carrying Hypomorphic Variants in Two NS Genes
Source: MDPI journal article supplement (doi:10.3390/ijms24044035), 2023-02-17
Supplement: s1 [file s1]

**Table S6. Differentially phosphorylated proteins belonging to RAS pathway**

| <b>Samples</b>   | <b>RAS pathway phosphoproteins<br/>with increased phosphorylation</b> | <b>RAS pathway phosphoproteins<br/>with decreased phosphorylation</b> |
|------------------|-----------------------------------------------------------------------|-----------------------------------------------------------------------|
| 53<br>(vs yHCs)  | PEBP1, GRB2                                                           | RHOA                                                                  |
| 53F<br>(vs aHCs) |                                                                       |                                                                       |
| 53M<br>(vs aHCs) |                                                                       | PEBP1, GRB2                                                           |
| 67<br>(vs yHCs)  | GRB2                                                                  | MAPK1, RHOA                                                           |
| 67F<br>(vs aHCs) |                                                                       | MAPK1, GRB2                                                           |
| 67M<br>(vs aHCs) |                                                                       | PEBP1                                                                 |

53 and 67, patients; F, father; M, mother; yHCs, young healthy controls; aHCs, adult healthy controls.
