# Supplementary material for: Changes of RAS Pathway Phosphorylation in Lymphoblastoid Cell Lines from Noonan Syndrome Patients Carrying Hypomorphic Variants in Two NS Genes
Source: MDPI journal article supplement (doi:10.3390/ijms24044035), 2023-02-17
Supplement: s1 [file s1]

**Table S2. Changes in phosphorylation degree of families 53 and 67 proteome**

| <b>Samples</b>    | <b>Number of identified phosphoproteins /proteins</b> | <b>Number of phosphoproteins without altered phosphorylation (%)</b> | <b>Number of phosphoproteins with increased phosphorylation (%)</b> | <b>Number of phosphoproteins with decreased phosphorylation (%)</b> |
|-------------------|-------------------------------------------------------|----------------------------------------------------------------------|---------------------------------------------------------------------|---------------------------------------------------------------------|
| 53<br>(vs yHCs)   | 270                                                   | 120 (44.4%)                                                          | 106 (39.3%)                                                         | 44 (16.3%)                                                          |
| 53F<br>(vs aHCs)  | 254                                                   | 148 (58.3%)                                                          | 49 (19.3%)                                                          | 57 (22.4%)                                                          |
| 53M<br>(vs aHCs)  | 256                                                   | 140 (54.7%)                                                          | 43 (16.8%)                                                          | 73 (28.5%)                                                          |
| 67<br>(vs yHCs)   | 343                                                   | 174 (50.7%)                                                          | 114 (33.2%)                                                         | 55 (16.1%)                                                          |
| 67F<br>(vs aHCs)  | 335                                                   | 196 (58.5%)                                                          | 71 (21.2%)                                                          | 68 (20.3%)                                                          |
| 67M<br>(vs aHCs)  | 338                                                   | 194 (57.4%)                                                          | 71 (21.0%)                                                          | 73 (21.6%)                                                          |
| yHCs<br>(vs aHCs) | 327                                                   | 166 (50.8%)                                                          | 95 (29.0%)                                                          | 66 (20.2%)                                                          |

53 and 67, patients; F, father; M, mother; yHCs, young healthy controls; aHCs, adult healthy controls.
