# Supplementary material for: Changes of RAS Pathway Phosphorylation in Lymphoblastoid Cell Lines from Noonan Syndrome Patients Carrying Hypomorphic Variants in Two NS Genes
Source: MDPI journal article supplement (doi:10.3390/ijms24044035), 2023-02-17
Supplement: s1 [file s1]

## Legends to supplementary figures

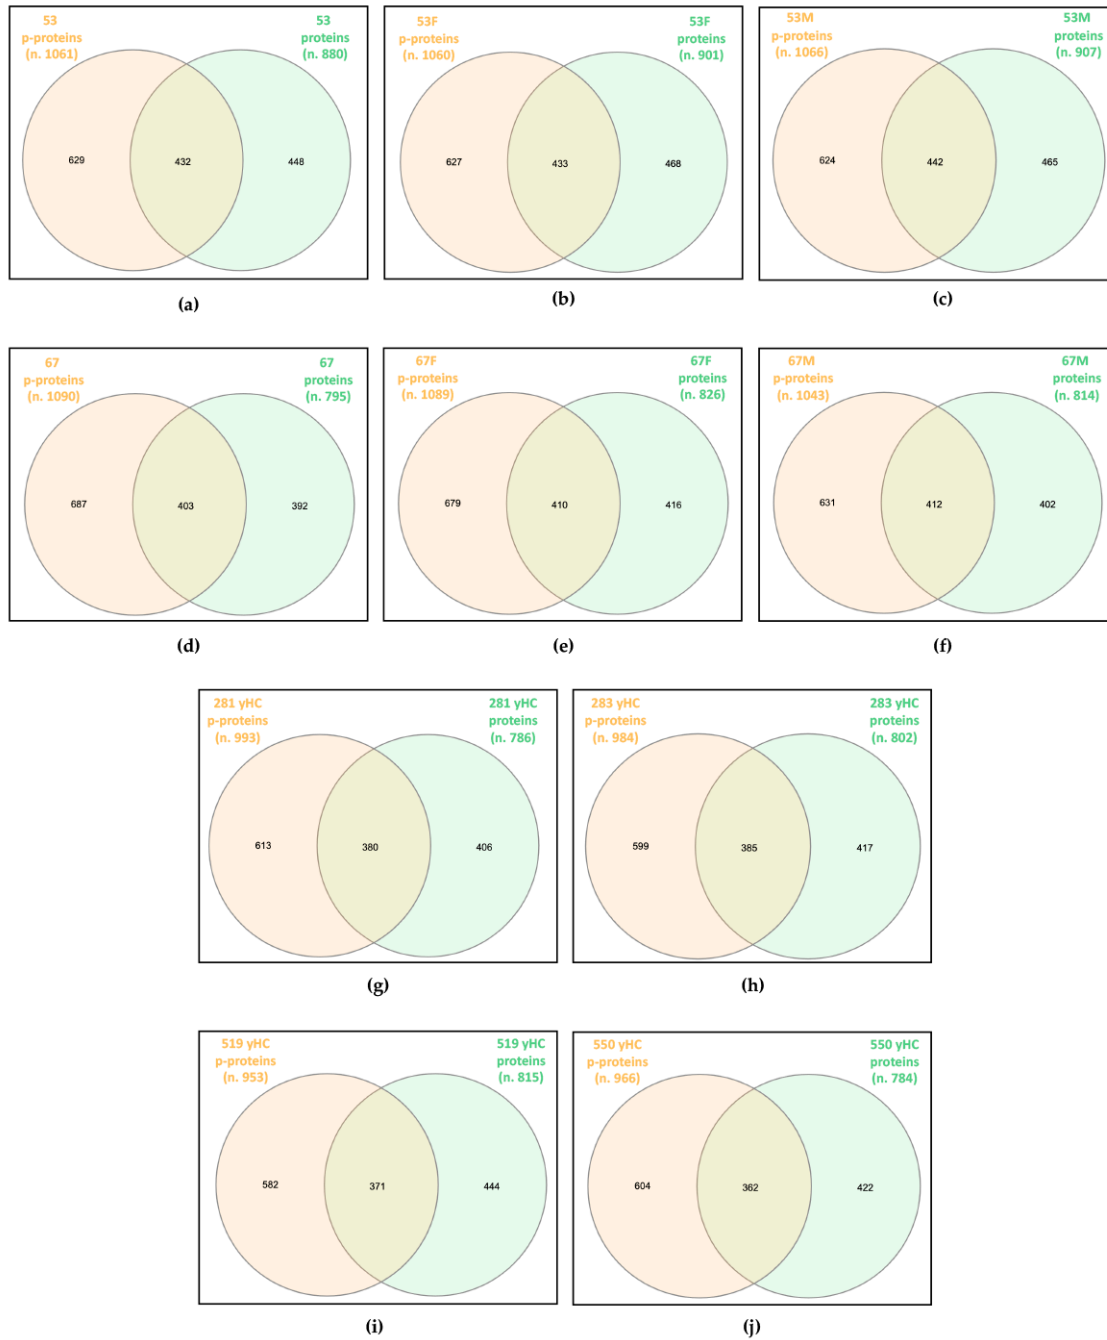

**Figure S1. Proteins represented both in proteome and phosphoproteome analyses.** The Venn diagrams, drawn using InteractiVenn tool, show the number of proteins identified by phosphoproteome analysis (p-proteins), proteome analysis (proteins), and in common between the two datasets, in: (a) Patient 53 (53); (b) Patient 53's father (53F); (c) Patient 53's mother (53M); (d) Patient 67 (67); (e) Patient 67's father (67F); (f) Patient 67's mother (67M); (g) 281 young healthy control (281 yHC); (h) 283 young healthy control (283 yHC); (i) 519 adult healthy control (519 aHC); (j) 550 adult healthy control (550 aHC).

RHOA Signaling

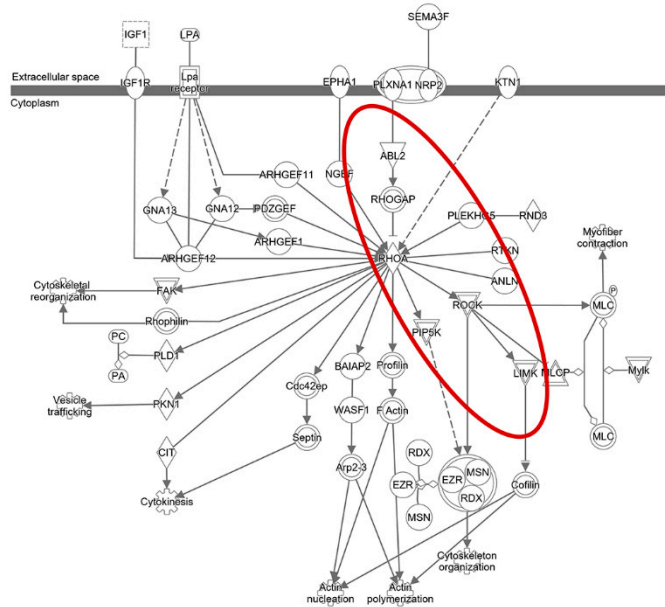

© 2000-2022 QIAGEN. All rights reserved.

(a)

CD28 Signaling in T Helper Cells

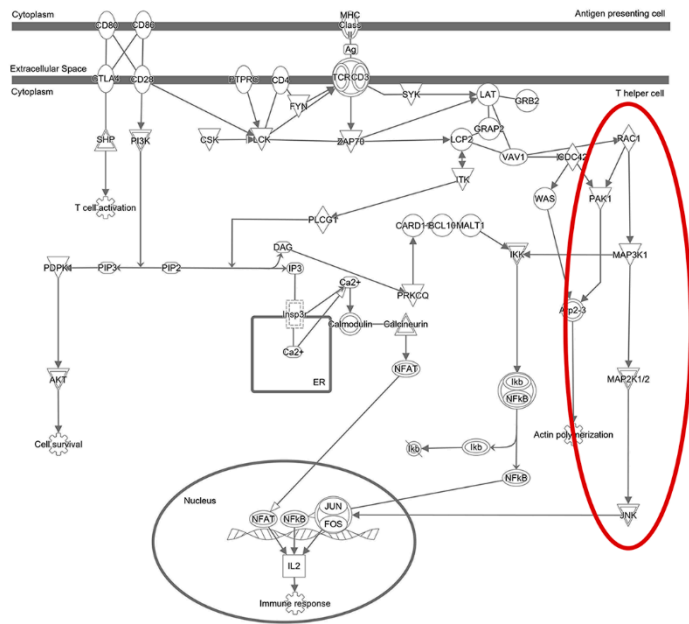

© 2000-2022 QIAGEN. All rights reserved.

(b)

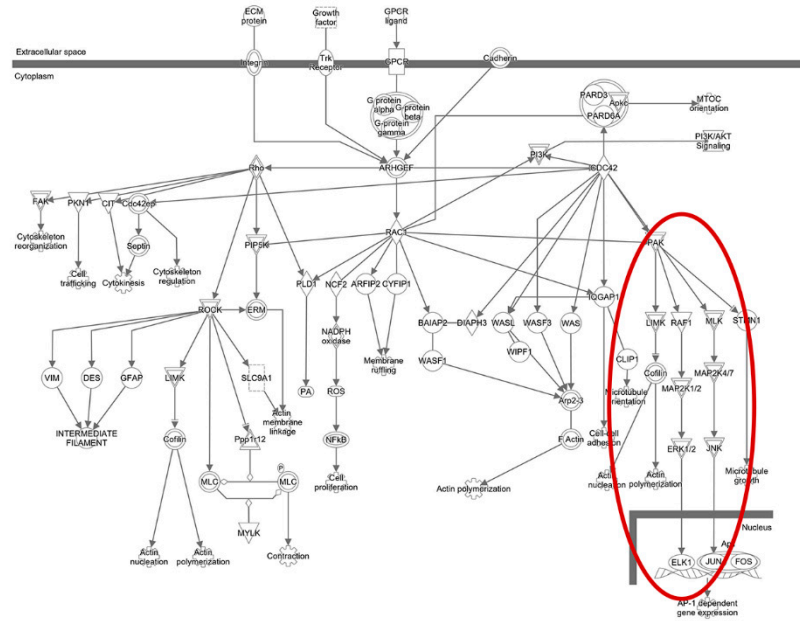

(c)

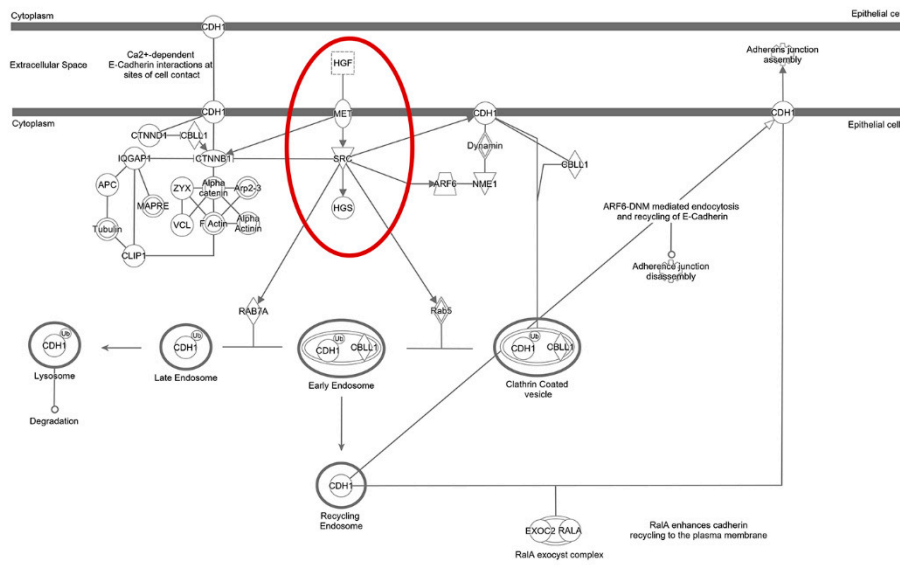

(d)

fMLP Signaling in Neutrophils

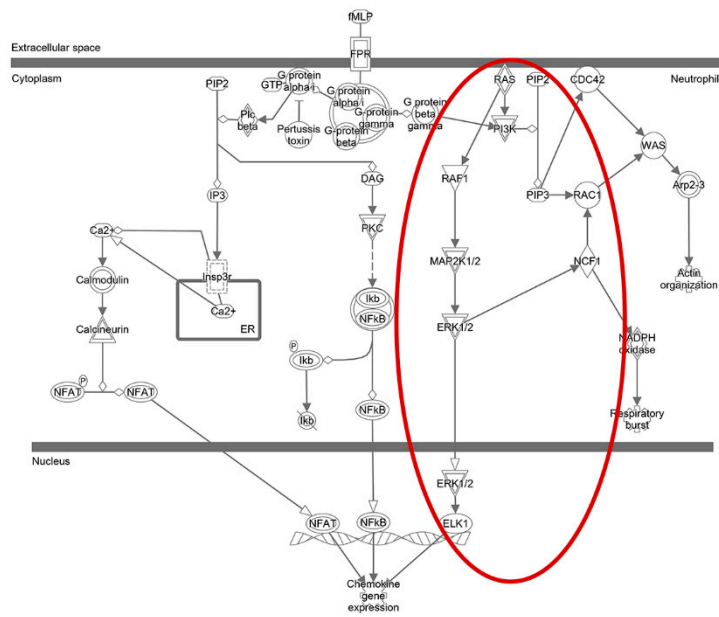

© 2005-2022 QIAGEN. All rights reserved.

(e)

CDC42 Signaling

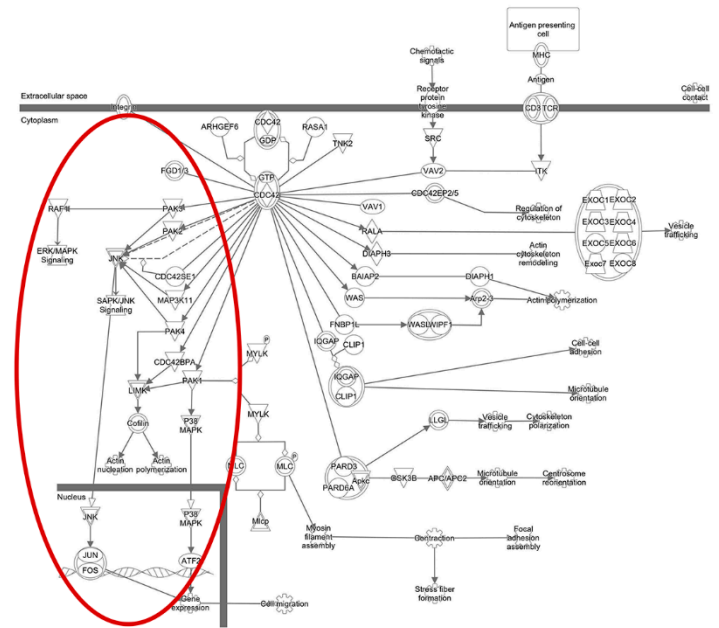

© 2005-2022 QIAGEN. All rights reserved.

(f)

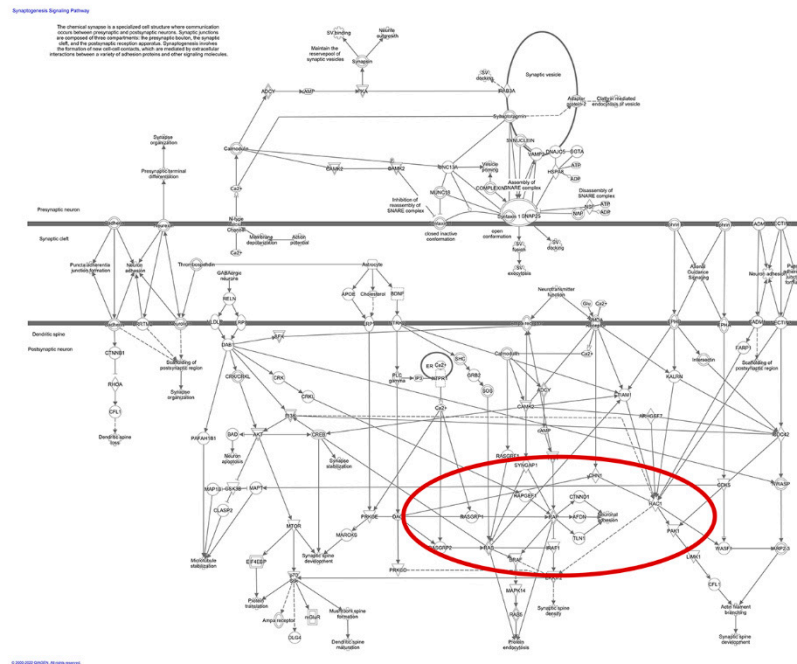

(g)

**Figure S2. Main activated pathways highlighted by IPA enrichment analysis.** Analysis of changed phosphoproteins/total protein datasets by IPA software identified the following seven canonical pathways significantly changed (Fisher's right-tailed exact test  $p$ -value  $< 0.05$  and  $z$ -score  $\geq 2$  or  $\leq -2$ ) in patients 53 and 67 vs. young healthy controls: (a) RHOA Signaling; (b) CD28 Signaling in T Helper Cells; (c) Signaling by Rho Family GTPases; (d) Remodeling of Epithelial Adherens Junctions; (e) fMLP Signaling in Neutrophils; (f) CDC42 Signaling; (g) Synaptogenesis Signaling Pathway. In both patient's parents (53F-53M, 67F-67M) vs. age-matched controls, the same pathways were unchanged or only slightly activated. The pathways' branches connected to RAS signaling are circled in red.

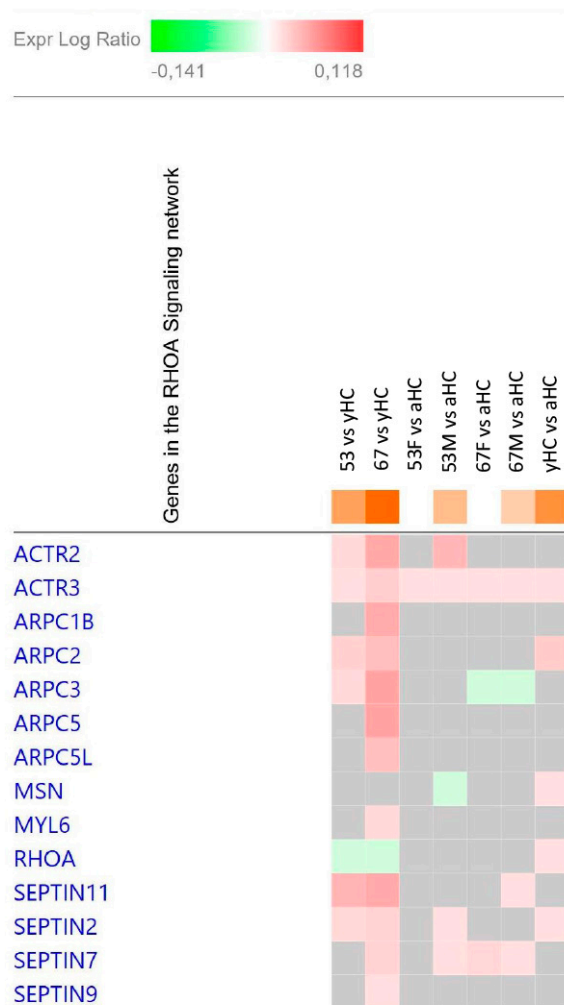

**Figure S3. RHOA Signaling gene heatmap.** The heatmap generated by IPA software shows the hypo-phosphorylation (in green) or hyper-phosphorylation (in red) of proteins belonging to RHOA signaling, based on log ratio data from LC-MS/MS analysis. Even if RHOA is hypo-phosphorylated in both patients (53 and 67) compared to young healthy controls (yHC), IPA software predicts the activation (orange rectangles) of RHOA Signaling in patients. In both patients' mothers (53M and 67M) vs. adult controls (aHC), the same pathway is only slightly activated, while RHOA Signaling activation is not predicted in the fathers (53F and 67F).
