# Supplementary material for: Changes of RAS Pathway Phosphorylation in Lymphoblastoid Cell Lines from Noonan Syndrome Patients Carrying Hypomorphic Variants in Two NS Genes
Source: MDPI journal article supplement (doi:10.3390/ijms24044035), 2023-02-17
Supplement: s1 [file s1]

**Table S4. Changes in phosphorylation degree of dysregulated proteins in families 53 and 67**

| Samples          | Number of proteins with altered expression and phosphorylation | Number of hyper-expressed and hyper-phosphorylated proteins (%) | Number of hypo-expressed and hypo-phosphorylated proteins (%) | Number of hyper-expressed and hypo-phosphorylated proteins (%) | Number of hypo-expressed and hyper-phosphorylated proteins (%) |
|------------------|----------------------------------------------------------------|-----------------------------------------------------------------|---------------------------------------------------------------|----------------------------------------------------------------|----------------------------------------------------------------|
| 53<br>(vs yHCs)  | 83                                                             | 3 (3.6%)                                                        | 6 (7.2%)                                                      | 12 (14.5%)                                                     | 62 (74.7%)                                                     |
| 53F<br>(vs aHCs) | 67                                                             | 7 (10.5%)                                                       | 10 (14.9%)                                                    | 26 (38.8%)                                                     | 24 (35.8%)                                                     |
| 53M<br>(vs aHCs) | 68                                                             | 8 (11.8%)                                                       | 8 (11.8%)                                                     | 29 (42.6%)                                                     | 23 (33.8%)                                                     |
| 67<br>(vs yHCs)  | 109                                                            | 8 (7.3%)                                                        | 6 (5.5%)                                                      | 23 (21.1%)                                                     | 72 (66.1%)                                                     |
| 67F<br>(vs aHCs) | 78                                                             | 5 (6.4%)                                                        | 6 (7.7%)                                                      | 35 (44.9%)                                                     | 32 (41.0%)                                                     |
| 67M<br>(vs aHCs) | 65                                                             | 5 (7.7%)                                                        | 8 (12.3%)                                                     | 26 (40.0%)                                                     | 26 (40.0%)                                                     |

53 and 67, patients; F, father; M, mother; yHCs, young healthy controls; aHCs, adult healthy controls.
