# Supplementary material for: Changes of RAS Pathway Phosphorylation in Lymphoblastoid Cell Lines from Noonan Syndrome Patients Carrying Hypomorphic Variants in Two NS Genes
Source: MDPI journal article supplement (doi:10.3390/ijms24044035), 2023-02-17
Supplement: s1 [file s1]

**Table S3. Changes in proteome expression pattern of families 53 and 67**

| <b>Samples</b>   | <b>Number of<br/>identified proteins</b> | <b>Number of proteins<br/>without altered<br/>expression level<br/>(%)</b> | <b>Number of proteins<br/>with increased<br/>expression level<br/>(%)</b> | <b>Number of proteins<br/>with decreased<br/>expression level<br/>(%)</b> |
|------------------|------------------------------------------|----------------------------------------------------------------------------|---------------------------------------------------------------------------|---------------------------------------------------------------------------|
| 53<br>(vs yHCs)  | 566                                      | 301 (53.2%)                                                                | 72 (12.7%)                                                                | 193 (34.1%)                                                               |
| 53F<br>(vs aHCs) | 578                                      | 295 (51.0%)                                                                | 139 (24.1%)                                                               | 144 (24.9%)                                                               |
| 53M<br>(vs aHCs) | 585                                      | 284 (48.5%)                                                                | 145 (24.8%)                                                               | 156 (26.7%)                                                               |
| 67<br>(vs yHCs)  | 732                                      | 328 (44.8%)                                                                | 132 (18.0%)                                                               | 272 (37.2%)                                                               |
| 67F<br>(vs aHCs) | 752                                      | 453 (60.2%)                                                                | 147 (19.6%)                                                               | 152 (20.2%)                                                               |
| 67M<br>(vs aHCs) | 748                                      | 489 (65.4%)                                                                | 134 (17.9%)                                                               | 125 (16.7%)                                                               |

53 and 67, patients; F, father; M, mother; yHCs, young healthy controls; aHCs, adult healthy controls.
