# Supplementary material for: Changes of RAS Pathway Phosphorylation in Lymphoblastoid Cell Lines from Noonan Syndrome Patients Carrying Hypomorphic Variants in Two NS Genes
Source: MDPI journal article supplement (doi:10.3390/ijms24044035), 2023-02-17
Supplement: s1 [file s1]

**Table S8. RAS pathway phosphoproteins with impaired expression, not identified in proteome**

| <b>Samples</b>   | <b>RAS pathway hyper-expressed phosphoproteins not identified in proteome</b> | <b>RAS pathway hypo-expressed phosphoproteins not identified in proteome</b> |
|------------------|-------------------------------------------------------------------------------|------------------------------------------------------------------------------|
| 53<br>(vs yHCs)  | TK1, PAK2                                                                     | PPP1CA, CASP3, MAPK1                                                         |
| 53F<br>(vs aHCs) | PTPN11                                                                        | PPP1CA, PAK2                                                                 |
| 53M<br>(vs aHCs) |                                                                               | PPP1CA, MAPK1, PAK2                                                          |
| 67<br>(vs yHCs)  | TK1                                                                           | FNTA, PPP1CA                                                                 |
| 67F<br>(vs aHCs) | TK1                                                                           | PPP1CA                                                                       |
| 67M<br>(vs aHCs) | PAK1                                                                          | RAC2                                                                         |

53 and 67, patients; F, father; M, mother; yHCs, young healthy controls; aHCs, adult healthy controls.
