# Supplementary material for: Changes of RAS Pathway Phosphorylation in Lymphoblastoid Cell Lines from Noonan Syndrome Patients Carrying Hypomorphic Variants in Two NS Genes
Source: MDPI journal article supplement (doi:10.3390/ijms24044035), 2023-02-17
Supplement: s1 [file s1]

**Table S5. RAS pathway genes**

| Gene symbol | Protein name from BioGPS                                                   | Alternative gene names from BioGPS                                  |
|-------------|----------------------------------------------------------------------------|---------------------------------------------------------------------|
| AKT1        | RAC-alpha serine/threonine-protein kinase                                  | AKT, CWS6, PKB, PKB-ALPHA, PRKBA, RAC, RAC-ALPHA                    |
| AKT2        | RAC-beta serine/threonine-protein kinase                                   | HIHGHH, PKBB, PKBBETA, PRKBB, RAC-BETA                              |
| AKT3        | RAC-gamma serine/threonine-protein kinase                                  | MPPH, MPPH2, PKB-GAMMA, PKBG, PRKBG, RAC-PK-gamma, RAC-gamma, STK-2 |
| ALK         | anaplastic lymphoma receptor tyrosine kinase; ALK tyrosine kinase receptor | CD246, NBLST3                                                       |
| APAF1       | apoptotic peptidase activating factor 1                                    | APAF-1, CED4                                                        |
| ARAF        | serine/threonine-protein kinase A-Raf                                      | A-RAF, ARAF1, PKS2, RAFA1                                           |
| ARHGAP35    | Rho GTPase-activating protein 35                                           | GRF-1, GRLF1, P190-A, P190A, p190ARhoGAP, p190RhoGAP                |
| ARHGEF2     | Rho/Rac guanine nucleotide exchange factor (GEF) 2                         | GEF, GEF-H1, GEFH1, LFP40, P40                                      |
| BARD1       | BRCA1 associated RING domain 1                                             | [none]                                                              |
| BRAF        | serine/threonine-protein kinase B-raf                                      | B-RAF1, BRAF1, NS7, RAFB1                                           |
| BRCA1       | breast cancer 1, early onset                                               | BRCA1, BRCC1, BROVCA1, IRIS, PNCA4, PPP1R53, PSCP, RNF53            |
| BRCA2       | breast cancer 2, early onset                                               | BRCC2, BROVCA2, FACD, FAD, FAD1, FANCD, FANCD1, GLM3, PNCA2         |
| BRIP1       | BRCA1 interacting protein C-terminal helicase 1                            | BACH1, FANCI, OF                                                    |
| BUB1        | BUB1 mitotic checkpoint serine/threonine kinase                            | BUB1A, BUB1L, hBUB1                                                 |
| CASP3       | caspase 3, apoptosis-related cysteine peptidase                            | CPP32, CPP32B, SCA-1                                                |
| CASP7       | caspase 7, apoptosis-related cysteine peptidase                            | CASP-7, CMH-1, ICE-LAP3, LICE2, MCH3                                |
| CASP8       | caspase 8, apoptosis-related cysteine peptidase                            | ALPS2B, CAP4, Casp-8, FLICE, MACH, MCH5                             |
| CBL         | Cbl proto-oncogene, E3 ubiquitin protein ligase                            | C-CBL, CBL2, FRA11B, NSLL, RNF55                                    |
| CBLB        | Cbl proto-oncogene B, E3 ubiquitin protein ligase                          | Cbl-b, RNF56                                                        |
| CBLC        | Cbl proto-oncogene C, E3 ubiquitin protein ligase                          | CBL-3, CBL-SL, RNF57                                                |
| CCNA1       | cyclin A1                                                                  | CT146                                                               |
| CCNA2       | cyclin A2                                                                  | CCN1, CCNA                                                          |
| CCND1       | cyclin D1                                                                  | BCL1, D11S287E, PRAD1, U21B31                                       |
| CCND2       | cyclin D2                                                                  | KIAK0002, MPPH3                                                     |
| CCND3       | cyclin D3                                                                  | [none]                                                              |
| CDC25A      | cell division cycle 25A                                                    | CDC25A2                                                             |
| CDC6        | cell division cycle 6                                                      | cell division cycle 6                                               |
| CDK2        | cyclin-dependent kinase 2                                                  | CDKN2, p33(CDK2)                                                    |
| CDK4        | cyclin-dependent kinase 4                                                  | CMM3, PSK-J3                                                        |
| CDK6        | cyclin-dependent kinase 6                                                  | PLSTIRE                                                             |
| CDKN1A      | cyclin-dependent kinase inhibitor 1A (p21, Cip1)                           | CAP20, CDKN1, CIP1, MDA-6, P21, SDI1, WAF1, p21CIP1                 |
| CNKSRI      | connector enhancer of kinase suppressor of Ras 1                           | CNK, CNK1                                                           |
| CNKSRI2     | connector enhancer of kinase suppressor of Ras 2                           | CNK2, KSR2, MAGUIN                                                  |
| CYTH2       | cytohesin 2                                                                | ARNO, CTS18, CTS18.1, PSCD2, PSCD2L, SEC7L, Sec7p-L, Sec7p-like     |
| DAB2IP      | DAB2 interacting protein                                                   | AF9Q34, AIP-1, AIP1, DIP1/2                                         |
| DHFR        | dihydrofolate reductase                                                    | DHFRP1, DYR                                                         |

|          |                                                               |                                                                                                   |
|----------|---------------------------------------------------------------|---------------------------------------------------------------------------------------------------|
| DUSP1    | dual specificity phosphatase 1                                | CL100, HVH1, MKP-1, MKP1, PTPN10                                                                  |
| DUSP2    | dual specificity phosphatase 2                                | PAC-1, PAC1                                                                                       |
| DUSP3    | dual specificity phosphatase 3                                | VHR                                                                                               |
| DUSP4    | dual specificity phosphatase 4                                | HVH2, MKP-2, MKP2, TYP                                                                            |
| DUSP5    | dual specificity phosphatase 5                                | DUSP, HVH3                                                                                        |
| DUSP6    | dual specificity phosphatase 6                                | HH19, MKP3, PYST1                                                                                 |
| E2F1     | E2F transcription factor 1                                    | E2F-1, RBAP1, RBBP3, RBP3                                                                         |
| E2F2     | E2F transcription factor 2                                    | E2F-2                                                                                             |
| E2F3     | E2F transcription factor 3                                    | E2F-3                                                                                             |
| E2F7     | E2F transcription factor 7                                    | [none]                                                                                            |
| ECT2     | epithelial cell transforming 2                                | ARHGEF31                                                                                          |
| EGFR     | epidermal growth factor receptor                              | ERBB, ERBB1, HER1, PIG61, mENA                                                                    |
| EIF4EBP1 | eukaryotic translation initiation factor 4E-binding protein 1 | 4E-BP1, 4EBP1, BP-1, PHAS-I                                                                       |
| EIF4EBP2 | eukaryotic translation initiation factor 4E binding protein 2 | 4EBP2, PHASII                                                                                     |
| EIF4EBP3 | eukaryotic translation initiation factor 4E binding protein 3 | 4E-BP3, 4EBP3                                                                                     |
| ELK1     | ELK1, member of ETS oncogene family                           | [none]                                                                                            |
| ERBB2    | receptor tyrosine-protein kinase erbB-2                       | CD340, HER-2, HER-2/neu, HER2, MLN 19, NEU, NGL, TKR1                                             |
| ERF      | Ets2 repressor factor                                         | CRS4, PE-2, PE2                                                                                   |
| ETS1     | v-ets avian erythroblastosis virus E26 oncogene homolog 1     | ETS-1, EWSR2, p54                                                                                 |
| ETS2     | v-ets avian erythroblastosis virus E26 oncogene homolog 2     | ETS2IT1                                                                                           |
| EXOC1    | Exocyst complex component 1                                   | BM-102, SEC3, SEC3L1, SEC3P                                                                       |
| EXOC2    | exocyst complex component 2                                   | SEC5, SEC5L1, Sec5p                                                                               |
| EXOC3    | exocyst complex component 3                                   | SEC6, SEC6L1, Sec6p                                                                               |
| EXOC4    | exocyst complex component 4                                   | SEC8, SEC8L1, Sec8p                                                                               |
| EXOC5    | exocyst complex component 5                                   | HSEC10, PRO1912, SEC10, SEC10L1, SEC10P                                                           |
| EXOC6    | exocyst complex component 6                                   | EXOC6A, SEC15, SEC15L, SEC15L1, SEC15L3, Sec15p                                                   |
| EXOC7    | exocyst complex component 7                                   | 2-5-3p, EX070, EXO70, EXOC1, Exo70p, YJL085W                                                      |
| EXOC8    | exocyst complex component 8                                   | EXO84, Exo84p, SEC84                                                                              |
| FANCA    | Fanconi anemia, complementation group A                       | FA, FA-H, FA1, FAA, FACA, FAH, FANCH                                                              |
| FANCC    | Fanconi anemia, complementation group C                       | FA3, FAC, FACC                                                                                    |
| FGFR1    | fibroblast growth factor receptor 1                           | BFGFR, CD331, CEK, FGFR, FGFR-1, FLG, FLT-2, FLT2, HBGFR, HH2, HRTFDS, KAL2, N-SAM, OGD, bFGF-R-1 |
| FGFR2    | fibroblast growth factor receptor 2                           | BBDS, BEK, BFR-1, CD332, CEK3, CFD1, ECT1, JWS, K-SAM, KGFR, TK14, TK25                           |
| FGFR3    | fibroblast growth factor receptor 3                           | CH, CD333, CEK2, HSGFR3EX, JTK4                                                                   |
| FGFR4    | fibroblast growth factor receptor 4                           | CD334, JTK2, TKF                                                                                  |
| FLT3     | fms-related tyrosine kinase 3                                 | CD135, FLK-2, FLK2, STK1                                                                          |
| FNTA     | farnesyltransferase, CAAX box, alpha                          | FPTA, PGGT1A, PTAR2                                                                               |
| FNTB     | farnesyltransferase, CAAX box, beta                           | FPTB                                                                                              |

|        |                                                                                 |                                                                                         |
|--------|---------------------------------------------------------------------------------|-----------------------------------------------------------------------------------------|
| FOS    | FBJ murine osteosarcoma viral oncogene homolog                                  | AP-1, C-FOS, p55                                                                        |
| FOSL1  | FOS-like antigen 1                                                              | FRA, FRA1, fra-1                                                                        |
| GRB10  | growth factor receptor-bound protein 10                                         | GRB-IR, Grb-10, IRBP, MEG1, RSS                                                         |
| GRB2   | growth factor receptor-bound protein 2                                          | ASH, EGFRBP-GRB2, Grb3-3, MST084, MSTP084, NCKAP2                                       |
| HRAS   | GTPase HRas                                                                     | C-BAS/HAS, C-H-RAS, C-HA-RAS1, CTLO, H-RASIDX, HAMSIV, HRAS1, RASH1, p21ras             |
| ICMT   | isoprenylcysteine carboxyl methyltransferase                                    | HSTE14, MST098, MSTP098, PCCMT, PCMT, PPMT                                              |
| INPP4B | inositol polyphosphate-4-phosphatase, type II, 105kDa                           | [none]                                                                                  |
| INSR   | insulin receptor                                                                | CD220, HHF5                                                                             |
| INSRR  | insulin receptor-related receptor                                               | IRR                                                                                     |
| IRS1   | insulin receptor substrate 1                                                    | HIRS-1                                                                                  |
| IRS2   | insulin receptor substrate 2                                                    | IRS-2                                                                                   |
| JUN    | Jun proto-oncogene                                                              | AP-1, AP1, c-Jun                                                                        |
| KRAS   | GTPase KRas                                                                     | C-K-RAS, CFC2, K-RAS2A, K-RAS2B, K-RAS4A, K-RAS4B, KI-RAS, KRAS1, KRAS2, NS, NS3, RASK2 |
| KSR1   | kinase suppressor of Ras 1                                                      | KSR, RSU2                                                                               |
| KSR2   | kinase suppressor of Ras 2                                                      | [none]                                                                                  |
| LRP1   | LDL receptor related protein 1                                                  | A2MR, APOER, APR, CD91, IGFBP-3R, IGFBP3R, IGFBP3R1, KPA, LRP, LRP1A, TGFBRS            |
| LZTR1  | leucine zipper like transcription regulator 1                                   | BTBD29, LZTR-1, NS10, NS2, SWNTS2                                                       |
| MAP2K1 | dual specificity mitogen-activated protein kinase kinase 1                      | CFC3, MAPKK1, MEK1, MKK1, PRKMK1                                                        |
| MAP2K2 | dual specificity mitogen-activated protein kinase kinase 2                      | CFC4, MAPKK2, MEK2, MKK2, PRKMK2                                                        |
| MAPK1  | mitogen-activated protein kinase 1                                              | ERK, ERK-2, ERK2, ERT1, MAPK2, P42MAPK, PRKM1, PRKM2, p38, p40, p41, p41mapk, p42-MAPK  |
| MAPK3  | mitogen-activated protein kinase 3                                              | ERK-1, ERK1, ERT2, HS44KDAP, HUMKER1A, P44ERK1, P44MAPK, PRKM3, p44-ERK1, p44-MAPK      |
| MCM3   | minichromosome maintenance complex component 3                                  | HCC5, P1-MCM3, P1.h, RLFB                                                               |
| MCM4   | minichromosome maintenance complex component 4                                  | CDC21, CDC54, NKCD, NKGCD, P1-CDC21, hCdc21                                             |
| MCM5   | minichromosome maintenance complex component 5                                  | CDC46, P1-CDC46                                                                         |
| MCM6   | minichromosome maintenance complex component 6                                  | MCG40308, Mis5, P105MCM                                                                 |
| MCM7   | minichromosome maintenance complex component 7                                  | CDC47, MCM2, P1.1-MCM3, P1CDC47, P85MCM, PNAS146, PPP1R104                              |
| MDM2   | MDM2 proto-oncogene, E3 ubiquitin protein ligase                                | ACTFS, HDMX, hdm2                                                                       |
| MET    | MET proto-oncogene, receptor tyrosine kinase; hepatocyte growth factor receptor | AUTS9, HGFR, RCCP2, c-Met                                                               |
| MLST8  | MTOR associated protein, LST8 homolog (S. cerevisiae)                           | GBL, GbetaL, LST8, POP3, WAT1                                                           |
| MRAS   | muscle RAS oncogene homolog                                                     | M-RAs, R-RAS3, RRAS3                                                                    |
| MTOR   | mechanistic target of rapamycin (serine/threonine kinase)                       | FRAP, FRAP1, FRAP2, RAFT1, RAPT1                                                        |
| MYB    | v-myb avian myeloblastosis viral oncogene homolog                               | Cmyb, c-myb, c-myb_CDS, efg                                                             |
| MYC    | v-myc avian myelocytomatosis viral oncogene homolog                             | MRTL, MYCC, bHLHe39, c-Myc                                                              |
| NF1    | neurofibromin                                                                   | NFNS, VRNF, WSS                                                                         |

|        |                                                                                                      |                                                                                      |
|--------|------------------------------------------------------------------------------------------------------|--------------------------------------------------------------------------------------|
| NFE2L2 | nuclear factor, erythroid 2-like 2                                                                   | NRF2                                                                                 |
| NFKB1  | nuclear factor of kappa light polypeptide gene enhancer in B-cells 1                                 | EBP-1, KBF1, NF-kB1, NF-kappa-B, NF-kappaB, NFKB-p105, NFKB-p50, NFkappaB, p105, p50 |
| NOX1   | NADPH oxidase 1                                                                                      | GP91-2, MOX1, NOH-1, NOH1                                                            |
| NRAS   | GTPase NRas                                                                                          | ALPS4, CMNS, N-ras, NCMS, NRAS1, NS6                                                 |
| PAK1   | p21 protein (Cdc42/Rac)-activated kinase 1                                                           | PAKalpha                                                                             |
| PAK2   | p21 protein (Cdc42/Rac)-activated kinase 2                                                           | PAK65, PAKgamma                                                                      |
| PAK3   | p21 protein (Cdc42/Rac)-activated kinase 3                                                           | CDKN1A, MRX30, MRX47, OPHN3, PAK3beta, bPAK, hPAK3                                   |
| PAK4   | p21 protein (Cdc42/Rac)-activated kinase 4                                                           | [none]                                                                               |
| PDGFRA | platelet-derived growth factor receptor alpha                                                        | CD140A, PDGFR-2, PDGFR2, RHEPDGFRA                                                   |
| PDGFRB | platelet-derived growth factor receptor beta                                                         | CD140B, IBGC4, IMF1, JTK12, PDGFR, PDGFR-1, PDGFR1                                   |
| PDPK1  | 3-phosphoinositide-dependent protein kinase 1                                                        | PDK1, PDPK2, PRO0461                                                                 |
| PEA15  | phosphoprotein enriched in astrocytes 15                                                             | HMAT1, HUMMAT1H, MAT1, MAT1H, PEA-15, PED                                            |
| PEBP1  | phosphatidylethanolamine binding protein 1                                                           | HCNP, HCNPpp, HEL-210, HEL-S-34, PBP, PEBP, PEBP-1, RKIP                             |
| PIK3CA | Phosphatidylinositol 4,5-bisphosphate 3-kinase catalytic subunit alpha isoform                       | CLOVE, CWS5, MCAP, MCM, MCMTC, PI3K, p110-alpha                                      |
| PIK3CD | phosphatidylinositol-4,5-bisphosphate 3-kinase, catalytic subunit delta                              | APDS, IMD14, P110DELTA, PI3K, p110D                                                  |
| PIK3CG | phosphatidylinositol-4,5-bisphosphate 3-kinase, catalytic subunit gamma                              | PI3CG, PI3K, PI3Kgamma, PIK3, p110gamma, p120-PI3K                                   |
| PIK3R1 | phosphatidylinositol 3-kinase regulatory subunit alpha                                               | AGM7, GRB1, p85, p85-ALPHA                                                           |
| PIK3R2 | phosphatidylinositol 3-kinase regulatory subunit beta                                                | MPPH, MPPH1, P85B, p85, p85-BETA                                                     |
| PIK3R3 | phosphatidylinositol 3-kinase regulatory subunit gamma                                               | p55, p55-GAMMA                                                                       |
| PIK3R5 | phosphoinositide 3-kinase regulatory subunit 5                                                       | F730038I15Rik, FOAP-2, P101-PI3K, p101                                               |
| PIK3R6 | phosphoinositide 3-kinase regulatory subunit 6                                                       | C17orf38, HsT41028, p84 PIKAP, p87(PIKAP), p87PIKAP                                  |
| PIN1   | peptidylprolyl cis/trans isomerase, NIMA-interacting 1                                               | DOD, UBL5                                                                            |
| PLCE1  | phospholipase C, epsilon 1                                                                           | NPHS3, PLCE, PPLC                                                                    |
| PLXNB1 | plexin B1                                                                                            | PLEXIN-B1, PLXN5, SEP                                                                |
| PPP1CA | protein phosphatase 1, catalytic subunit, alpha isozyme                                              | PP-1A, PP1A, PP1alpha, PPP1A                                                         |
| PREX2  | phosphatidylinositol-3,4,5-trisphosphate-dependent Rac exchange factor 2                             | 6230420N16Rik, DEP.2, DEPDC2, P-REX2, PPP1R129                                       |
| PRKAA1 | 5'-AMP-activated protein kinase catalytic subunit alpha-1                                            | AMPK, AMPKa1                                                                         |
| PRKAA2 | 5'-AMP-activated protein kinase catalytic subunit alpha-2                                            | AMPK, AMPK2, AMPKa2, PRKAA                                                           |
| PRKAB1 | 5'-AMP-activated protein kinase subunit beta-1                                                       | AMPK, HAMPKb                                                                         |
| PRKAB2 | 5'-AMP-activated protein kinase subunit beta-2                                                       | [none]                                                                               |
| PRKAG1 | protein kinase, AMP-activated, gamma 1 non-catalytic subunit                                         | AMPKG                                                                                |
| PRKAG2 | protein kinase, AMP-activated, gamma 2 non-catalytic subunit                                         | AAKG, AAKG2, CMH6, H91620p, WPWS                                                     |
| PRKAG3 | protein kinase, AMP-activated, gamma 3 non-catalytic subunit                                         | AMPKG3                                                                               |
| PTEN   | phosphatidylinositol 3,4,5-trisphosphate 3-phosphatase and dual-specificity protein phosphatase PTEN | 10q23del, BZS, CWS1, DEC, GLM2, MHAM, MMAC1, PTEN1, TEP1                             |

|          |                                                                                         |                                                                           |
|----------|-----------------------------------------------------------------------------------------|---------------------------------------------------------------------------|
| PTPN11   | protein tyrosine phosphatase, non-receptor type 11                                      | BPTP3, CFC, NS1, PTP-1D, PTP2C, SH-PTP2, SH-PTP3, SHP2                    |
| RAC1     | Ras-related C3 botulinum toxin substrate 1 (rho family, small GTP binding protein Rac1) | Rac-1, TC-25, p21-Rac1                                                    |
| RAC2     | Ras-related C3 botulinum toxin substrate 2 (rho family, small GTP binding protein Rac2) | EN-7, Gx, HSPC022, p21-Rac2                                               |
| RAC3     | Ras-related C3 botulinum toxin substrate 3 (rho family, small GTP binding protein Rac3) | [none]                                                                    |
| RAD52    | RAD52 homolog (S. cerevisiae)                                                           | [none]                                                                    |
| RAF1     | RAF proto-oncogene serine/threonine-protein kinase                                      | CMD1NN, CRAF, NS5, Raf-1, c-Raf                                           |
| RALA     | Ras-related protein Ral-A                                                               | RAL                                                                       |
| RALB     | Ras-related protein Ral-B                                                               | [none]                                                                    |
| RALBP1   | RalA binding protein 1                                                                  | RIP1, RLIP1, RLIP76                                                       |
| RALGAPA1 | Ral GTPase activating protein, alpha subunit 1 (catalytic)                              | GARNL1, GRIPE, RalGAPalpha1, TULIP1, p240                                 |
| RALGAPA2 | Ral GTPase activating protein, alpha subunit 2 (catalytic)                              | AS250, C20orf74, bA287B20.1, dJ1049G11, dJ1049G11.4, p220                 |
| RALGDS   | Ral guanine nucleotide dissociation stimulator                                          | RGDS, RGF, RalGEF                                                         |
| RAPGEF1  | Rap guanine nucleotide exchange factor (GEF) 1                                          | C3G, GRF2                                                                 |
| RAPGEF2  | Rap guanine nucleotide exchange factor (GEF) 2                                          | CNrasGEF, NRAPGEF, PDZ-GEF1, PDZGEF1, RA-GEF, RA-GEF-1, Rap-GEF, nRap GEP |
| RASA1    | Ras GTPase-activating protein 1                                                         | CM-AVM, CMAVM, GAP, PKWS, RASA, RASGAP, p120GAP, p120RASGAP               |
| RASA2    | Ras GTPase-activating protein 2                                                         | GAP1M                                                                     |
| RASA3    | Ras GTPase-activating protein 3                                                         | GAP1IP4BP, GAPIII                                                         |
| RASAL1   | RasGAP-activating-like protein 1                                                        | RASAL                                                                     |
| RASAL2   | Ras GTPase-activating protein nGAP                                                      | NGAP                                                                      |
| RASAL3   | RAS protein activator like-3                                                            | [none]                                                                    |
| RASGRF1  | Ras protein-specific guanine nucleotide-releasing factor 1                              | CDC25, CDC25L, GNRP, GRF1, GRF55, H-GRF55, PP13187, ras-GRF1              |
| RASGRF2  | Ras protein-specific guanine nucleotide-releasing factor 2                              | GRF2, RAS-GRF2                                                            |
| RASGRP1  | RAS guanyl-releasing protein 1                                                          | CALDAG-GEFI, CALDAG-GEFII, RASGRP, V, hRasGRP1                            |
| RASGRP2  | RAS guanyl-releasing protein 2                                                          | CALDAG-GEFI, CDC25L                                                       |
| RASGRP3  | Ras guanyl-releasing protein 3                                                          | GRP3, KIAA0846                                                            |
| RASGRP4  | RAS guanyl-releasing protein 4                                                          | [none]                                                                    |
| RASSF1   | Ras association (RalGDS/AF-6) domain family member 1                                    | 123F2, NORE2A, RASSF1A, RDA32, REH3P21                                    |
| RASSF10  | Ras association (RalGDS/AF-6) domain family (N-terminal) member 10                      | [none]                                                                    |
| RASSF2   | Ras association (RalGDS/AF-6) domain family member 2                                    | CENP-34, RASFADIN                                                         |
| RASSF3   | Ras association (RalGDS/AF-6) domain family member 3                                    | RASSF5                                                                    |
| RASSF4   | Ras association (RalGDS/AF-6) domain family member 4                                    | AD037                                                                     |
| RASSF5   | Ras association (RalGDS/AF-6) domain family member 5                                    | Maxp1, NORE1, NORE1A, NORE1B, RAPL, RASSF3                                |
| RASSF6   | Ras association (RalGDS/AF-6) domain family member 6                                    | [none]                                                                    |
| RASSF7   | Ras association (RalGDS/AF-6) domain family (N-terminal) member 7                       | C11orf13, HRAS1, HRC1                                                     |
| RASSF8   | Ras association (RalGDS/AF-6) domain family (N-terminal) member 8                       | C12orf2, HOJ1                                                             |

|         |                                                                   |                                                                                             |
|---------|-------------------------------------------------------------------|---------------------------------------------------------------------------------------------|
| RASSF9  | Ras association (RalGDS/AF-6) domain family (N-terminal) member 9 | P-CIP1, PAMCI, PCIP1                                                                        |
| RB1     | Retinoblastoma 1                                                  | OSRC, PPP1R130, RB, p105-Rb, pRb, pp110                                                     |
| RCE1    | Ras converting CAAX endopeptidase 1                               | FACE2, RCE1A, RCE1B                                                                         |
| RGL1    | ral guanine nucleotide dissociation stimulator-like 1             | RGL                                                                                         |
| RGL2    | ral guanine nucleotide dissociation stimulator-like 2             | HKE1.5, KE1.5, RAB2L                                                                        |
| RGL3    | ral guanine nucleotide dissociation stimulator-like 3             | [none]                                                                                      |
| RHEB    | Ras Homolog Enriched In Brain, GTP-binding protein Rheb           | RHEB2                                                                                       |
| RHOA    | Ras homolog family member A                                       | ARH12, ARHA, RHO12, RHOH12                                                                  |
| RHOB    | Ras homolog family member B                                       | ARH6, ARHB, MST081, MSTP081, RHOH6                                                          |
| RHOC    | Ras homolog family member C                                       | ARH9, ARHC, H9, RHOH9                                                                       |
| ROCK1   | Rho-associated, coiled-coil containing protein kinase 1           | P160ROCK, ROCK-I                                                                            |
| ROCK2   | Rho-associated, coiled-coil containing protein kinase 2           | ROCK-II                                                                                     |
| ROS1    | ROS proto-oncogene 1, receptor tyrosine kinase                    | MCF3, ROS, c-ros-1                                                                          |
| RPS6KA1 | ribosomal protein S6 kinase alpha-1                               | MAPKAPK1A, RSK1                                                                             |
| RPS6KA2 | ribosomal protein S6 kinase alpha-2                               | HU-2, MAPKAPK1C, RSK, RSK3, S6K-alpha, S6K-alpha2, p90-RSK3, pp90RSK3                       |
| RPS6KA3 | ribosomal protein S6 kinase alpha-3                               | CLS, HU-3, ISPK-1, MAPKAPK1B, MRX19, RSK, RSK2, S6K-alpha3, p90-RSK2, pp90RSK2              |
| RPS6KA6 | ribosomal protein S6 kinase alpha-6                               | PP90RSK4, RSK4                                                                              |
| RPS6KB1 | ribosomal protein S6 kinase, 70kDa, polypeptide 1                 | PS6K, S6K, S6K-beta-1, S6K1, STK14A, p70 S6KA, p70(S6K)-alpha, p70-S6K, p70-alpha           |
| RPS6KB2 | ribosomal protein S6 kinase, 70kDa, polypeptide 2                 | KLS, P70-beta, P70-beta-1, P70-beta-2, S6K-beta2, S6K2, SRK, STK14B, p70(S6K)-beta, p70S6Kb |
| RPTOR   | regulatory associated protein of MTOR, complex 1                  | KOG1, Mip1                                                                                  |
| SAV1    | salvador family WW domain containing protein 1                    | SAV, WW45, WWP4                                                                             |
| SCRIB   | scribbled planar cell polarity protein                            | CRIB1, SCRIB1, SCRIB1, Vartul                                                               |
| SHC1    | SHC (Src homology 2 domain containing) transforming protein 1     | SHC, SHCA                                                                                   |
| SHC2    | SHC (Src homology 2 domain containing) transforming protein 2     | SCK, SHCB, SLI                                                                              |
| SHC3    | SHC (Src homology 2 domain containing) transforming protein 3     | N-Shc, NSHC, RAI, SHCC                                                                      |
| SHC4    | SHC (Src homology 2 domain containing) transforming protein 4     | RaLP, SHCD                                                                                  |
| SHOC2   | Soc-2 suppressor of clear homolog (C. elegans)                    | SIAA0862, SOC2, SUR8                                                                        |
| SOS1    | Son of sevenless homolog 1                                        | GF1, GGF1, GINGF, HGF, NS4                                                                  |
| SOS2    | Son of sevenless homolog 2                                        | [none]                                                                                      |
| SPRED1  | Sprouty-related, EVH1 domain-containing protein 1                 | NFLS, PPP1R147, hSpred1, spred-1                                                            |
| SPRED2  | Sprouty-related, EVH1 domain-containing protein 2                 | Spred-2                                                                                     |
| SPRED3  | Sprouty-related, EVH1 domain-containing protein 3                 | Eve-3, spred-3                                                                              |
| SPRY1   | protein sprouty homolog 1                                         | hSPRY1                                                                                      |
| SPRY2   | protein sprouty homolog 2                                         | hSPRY2                                                                                      |
| SPRY3   | protein sprouty homolog 3                                         | HSPRY3, spry-3                                                                              |
| SPRY4   | protein sprouty homolog 4                                         | HH17                                                                                        |
| STK11   | serine/threonine-protein kinase STK11                             | LKB1, PJS, hLKB1                                                                            |

|       |                                                        |                                           |
|-------|--------------------------------------------------------|-------------------------------------------|
| STK3  | serine/threonine kinase 3                              | KRS1, MST2                                |
| STK4  | serine/threonine kinase 4                              | KRS2, MST1, TIIAC, YSK3                   |
| TBK1  | TANK-binding kinase 1                                  | NAK, T2K                                  |
| TFDP1 | transcription factor Dp-1                              | DP1, DRTF1, Dp-1                          |
| TFDP2 | transcription factor Dp-2 (E2F dimerization partner 2) | DP2                                       |
| TIAM1 | T-lymphoma invasion and metastasis-inducing protein 1  | [none]                                    |
| TIAM2 | T-lymphoma invasion and metastasis-inducing protein 2  | STEF, TIAM-2                              |
| TK1   | thymidine kinase 1, soluble                            | TK2                                       |
| TP53  | tumor protein p53                                      | BCC7, LFS1, P53, TRP53                    |
| TP73  | tumor protein p73                                      | P73                                       |
| TSC1  | Tuberous Sclerosis 1, Hamartin                         | LAM, TSC                                  |
| TSC2  | Tuberous Sclerosis 2, Tuberin                          | LAM, PPP1R160, TSC4                       |
| TYMS  | thymidylate synthetase                                 | HST422, TMS, TS                           |
| UNG   | uracil-DNA glycosylase                                 | DGU, HIGM4, HIGM5, UDG, UNG1, UNG15, UNG2 |
| VAV1  | vav 1 guanine nucleotide exchange factor               | VAV                                       |
| YAP1  | Yes-associated protein 1                               | COB1, YAP, YAP2, YAP65, YKI               |
