# Supplementary material for: Changes of RAS Pathway Phosphorylation in Lymphoblastoid Cell Lines from Noonan Syndrome Patients Carrying Hypomorphic Variants in Two NS Genes
Source: MDPI journal article supplement (doi:10.3390/ijms24044035), 2023-02-17
Supplement: s1 [file s1]

**Table S7. RAS pathway proteins showing unchanged degree of phosphorylation, but differentially expressed in the proteome**

| <b>Samples</b>   | <b>RAS pathway hyper-expressed proteins with unchanged degree of phosphorylation</b> | <b>RAS pathway hypo-expressed proteins with unchanged degree of phosphorylation</b> |
|------------------|--------------------------------------------------------------------------------------|-------------------------------------------------------------------------------------|
| 53<br>(vs yHCs)  |                                                                                      |                                                                                     |
| 53F<br>(vs aHCs) |                                                                                      | PEBP1                                                                               |
| 53M<br>(vs aHCs) |                                                                                      |                                                                                     |
| 67<br>(vs yHCs)  |                                                                                      | PEBP1                                                                               |
| 67F<br>(vs aHCs) |                                                                                      | PEBP1                                                                               |
| 67M<br>(vs aHCs) |                                                                                      | GRB2                                                                                |

53 and 67, patients; F, father; M, mother; yHCs, young healthy controls; aHCs, adult healthy controls.
