# Supplementary material for: Changes of RAS Pathway Phosphorylation in Lymphoblastoid Cell Lines from Noonan Syndrome Patients Carrying Hypomorphic Variants in Two NS Genes
Source: MDPI journal article supplement (doi:10.3390/ijms24044035), 2023-02-17
Supplement: s1 [file s1]

**Table S1. Changes in phosphoproteome expression pattern of families 53 and 67**

| <b>Samples</b>   | <b>Number of<br/>identified<br/>phosphoproteins</b> | <b>Number of<br/>phosphoproteins<br/>without altered<br/>expression level<br/>(%)</b> | <b>Number of<br/>phosphoproteins<br/>with increased<br/>expression level<br/>(%)</b> | <b>Number of<br/>phosphoproteins<br/>with decreased<br/>expression level<br/>(%)</b> |
|------------------|-----------------------------------------------------|---------------------------------------------------------------------------------------|--------------------------------------------------------------------------------------|--------------------------------------------------------------------------------------|
| 53<br>(vs yHCs)  | 894                                                 | 578 (64.7%)                                                                           | 153 (17.1%)                                                                          | 163 (18.2%)                                                                          |
| 53F<br>(vs aHCs) | 868                                                 | 470 (54.1%)                                                                           | 135 (15.6%)                                                                          | 263 (30.3%)                                                                          |
| 53M<br>(vs aHCs) | 859                                                 | 416 (48.4%)                                                                           | 129 (15.0%)                                                                          | 314 (36.6%)                                                                          |
| 67<br>(vs yHCs)  | 891                                                 | 540 (60.6%)                                                                           | 175 (19.6%)                                                                          | 176 (19.8%)                                                                          |
| 67F<br>(vs aHCs) | 884                                                 | 614 (69.5%)                                                                           | 130 (14.7%)                                                                          | 140 (15.8%)                                                                          |
| 67M<br>(vs aHCs) | 860                                                 | 472 (54.9%)                                                                           | 156 (18.1%)                                                                          | 232 (27.0%)                                                                          |

53 and 67, patients; F, father; M, mother; yHCs, young healthy controls; aHCs, adult healthy controls.
